**Table S1.**

[Click here to download Table S1](#)
